# Supplementary material
Source: Springer Nature journal article supplement (https://www.springermedizin.de/resource/supplementary/12957_2014_1886_MOESM7_ESM.docx/9563768)
Supplement: MOESM7 [file 9563768]

**Table2.Univariate and Multivariate Analyses of Factors Associated with Survival in Gastric Cancer Patients with Neoadjuvant Chemotherapy**

| **Variable** | **Univariate Analysis** | |  | **Multivariate Analysis** | |
| --- | --- | --- | --- | --- | --- |
| **Hazard Ratio (95%CI)** | ***P* Value** |  | **Hazard Ratio (95%CI)** | ***P* Value** |
| **CA19-9** | | | | | |
| Positive *vs.* Negative | 2.198 （1.459-3.311） | **0.000** |  | 2.183 (1.085-4.392) | **0.029** |
| **CA72-4** | | | | | |
| Positive *vs.* Negative | 1.887 （1.241-2.869） | **0.003** |  | 2.500 (1.269-4.926) | **0.008** |
| **Vascular Invasion** | | | | | |
| Positive *vs.* Negative | 2.401 （1.616-3.567） | **0.000** |  | 1.564 （0.817-2.995） | 0.177 |
| **TNM (Pathological)** | | | | | |
| III+IV *vs.* I+II | 6.041 （3.295-11.074） | **0.000** |  | 5.066 （1.887-13.599） | **0.001** |
| **Recurrence** | | | | | |
| Positive *vs.* Negative | 1.745 （1.161-2.625） | **0.007** |  | 0.755 （0.337-1.693） | 0.495 |
| **Clinical Response to NCT** | | | | | |
| PD *vs.* DC | 2.474 （1.274-4.802） | **0.007** |  | 1.103 （0.404-3.013） | 0.849 |
| **Pathologic Response to NCT** | | | | | |
| pCR+pPR *vs.* pNR | 0.419 （0.218-0.805） | **0.009** |  | 0.739 （0.322-1.696） | 0.475 |
